# Supplementary material for: Intravascular flow stimulates PKD2 (polycystin-2) channels in endothelial cells to reduce blood pressure
Source: eLife journal article supplement (doi:10.7554/elife.56655), 2020-05-04
Supplement: supp [file elife-56655-supp-v1.zip]

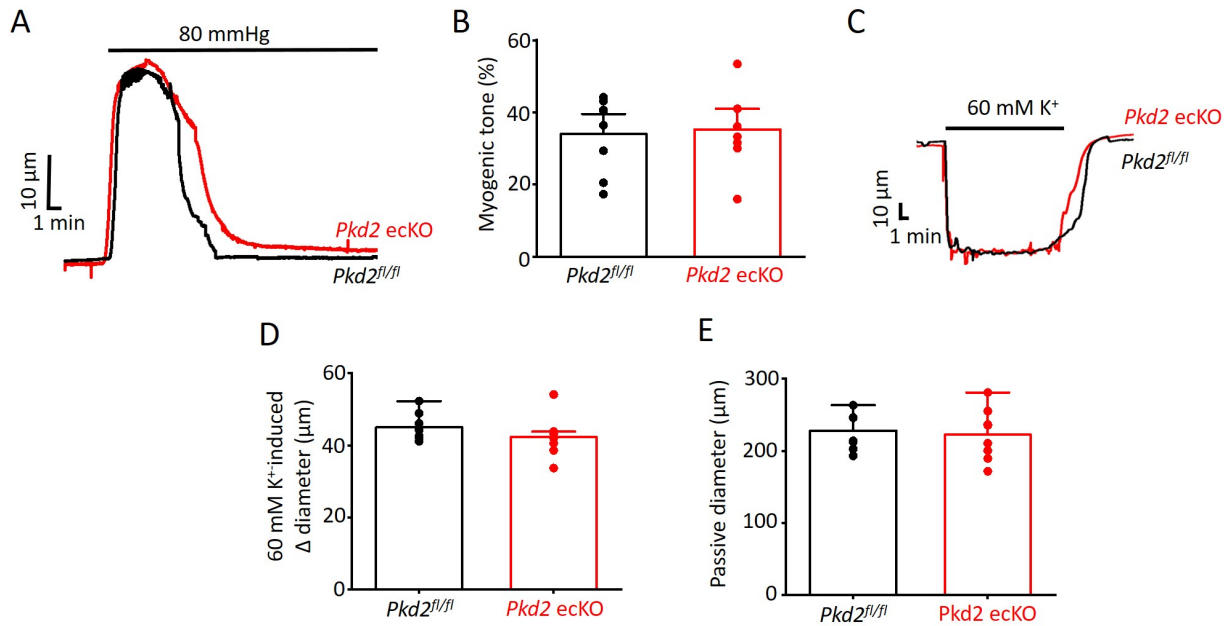

**Figure 2 – figure supplement 4.** Smooth muscle-specific vasoconstriction and passive diameter are unaltered in *Pkd2* *ecKO* arteries. (A) Representative traces illustrating the development of myogenic tone in pressurized (80mmHg) *Pkd2* *fl/fl* and *Pkd2* *ecKO* arteries. (B) Mean myogenic tone in pressurized (80mmHg) mesenteric arteries from *Pkd2* *fl/fl* and *Pkd2* *ecKO*. n=8 for each. (C) Representative traces illustrating 60 mM  $K^+$  constriction in pressurized (10 mmHg) arteries. (D) Mean data for 60 mM  $K^+$ -induced constriction. n=8. (E) Mean data for passive diameter ( $Ca^{2+}$ - free PSS) in pressurized (80 mmHg) arteries. n=8.
