# Supplementary material for: Intravascular flow stimulates PKD2 (polycystin-2) channels in endothelial cells to reduce blood pressure
Source: eLife journal article supplement (doi:10.7554/elife.56655), 2020-05-04
Supplement: supp [file elife-56655-supp-v1.zip]

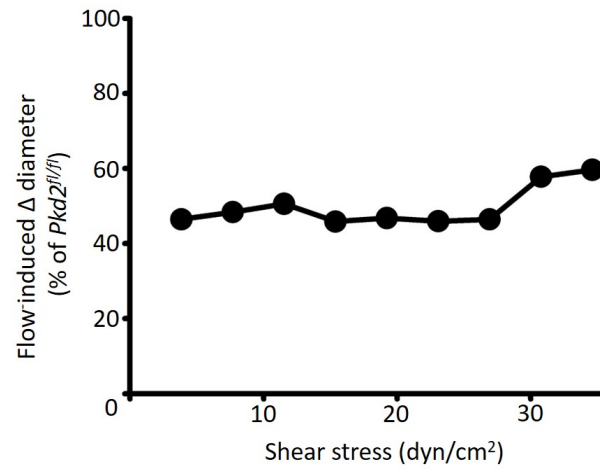

**Figure 2 – figure supplement 3.** Endothelial cell PKD2 knockout attenuates flow-mediated vasodilation over a broad shear stress range. Mean data illustrating relative dilation to shear stress in pressurized (80mmHg) *Pkd2* ecKO arteries compared with *Pkd2<sup>fl/fl</sup>* arteries. n=4-5.
