# Supplementary material for: Intravascular flow stimulates PKD2 (polycystin-2) channels in endothelial cells to reduce blood pressure
Source: eLife journal article supplement (doi:10.7554/elife.56655), 2020-05-04
Supplement: supp [file elife-56655-supp-v1.zip]

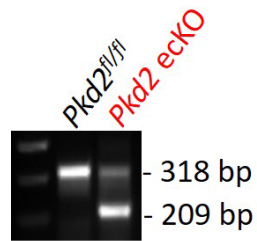

**Figure 1 – figure supplement 1.** Genotyping of mouse lines. Genomic PCR indicating that tamoxifen (1 mg/ml, i.p., 3 days) stimulated Cre-recombination in mesenteric arteries of *Pkd2<sup>fl/fl</sup>; Cdh5(PAC)-creERT2* mice. Representative of n=3.
