# Supplementary material for: Intravascular flow stimulates PKD2 (polycystin-2) channels in endothelial cells to reduce blood pressure
Source: eLife journal article supplement (doi:10.7554/elife.56655), 2020-05-04
Supplement: supp [file elife-56655-supp-v1.zip]

Archive with 7 entries (7 files):
- elife_poa_e56655_Transparent_Reporting_File.docx
- elife_poa_e56655_Figure_1_figure_supplement_1.pdf
- elife_poa_e56655_Figure_2_figure_supplement_1.pdf
- elife_poa_e56655_Figure_2_figure_supplement_2.pdf
- elife_poa_e56655_Figure_2_figure_supplement_3.pdf
- elife_poa_e56655_Figure_2_figure_supplement_4.pdf
- elife_poa_e56655_Figure_8_figure_supplement_1.pdf
