# Supplementary material for: Intravascular flow stimulates PKD2 (polycystin-2) channels in endothelial cells to reduce blood pressure
Source: eLife journal article supplement (doi:10.7554/elife.56655), 2020-05-04
Supplement: supp [file elife-56655-supp-v1.zip › elife_poa_e56655_Figure_2_figure_supplement_1.pdf]

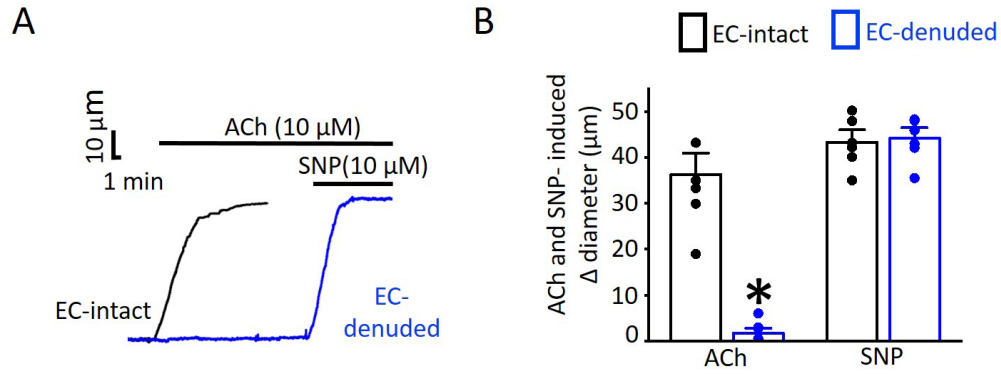

**Figure 2 – figure supplement 1.** Endothelial denudation abolishes ACh-mediated vasodilation.

(A) Original traces demonstrating responses to ACh (10 μM) and SNP (10 μM) in EC-intact (black) and EC-denuded (blue) pressurized (80mmHg) mesenteric arteries of *Pkd2<sup>fl/fl</sup>*. (B) Mean data. \*  $P < 0.05$  vs. EC-intact.  $n = 8$  for each.
