# Supplementary material for: Intravascular flow stimulates PKD2 (polycystin-2) channels in endothelial cells to reduce blood pressure
Source: eLife journal article supplement (doi:10.7554/elife.56655), 2020-05-04
Supplement: supp [file elife-56655-supp-v1.zip › elife_poa_e56655_Figure_2_figure_supplement_2.pdf]

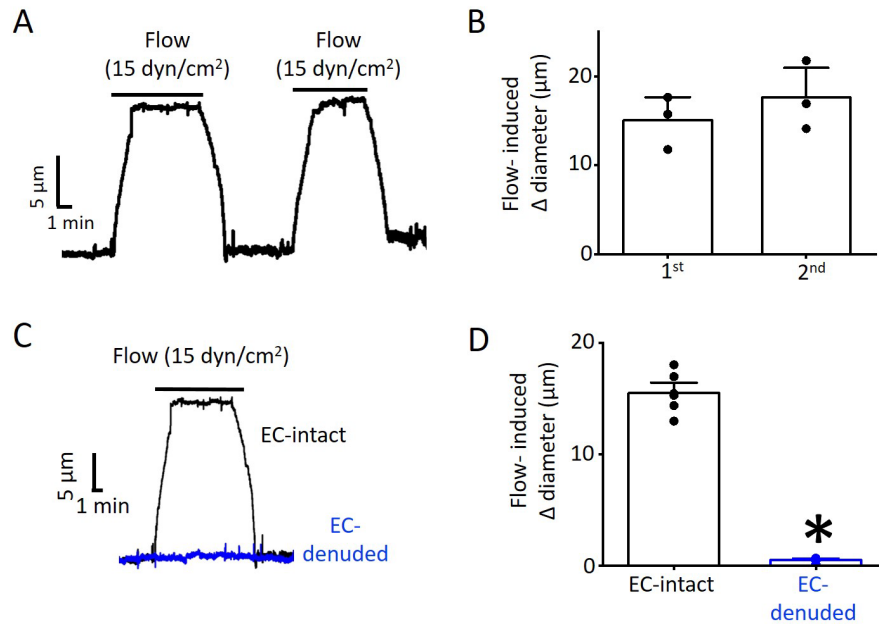

**Figure 2 – figure supplement 2.** Endothelial denudation abolishes flow-mediated dilation.

(A) Original traces demonstrating reproducible flow responses (15 dyn/cm<sup>2</sup>) in pressurized *Pkd2<sup>fl/fl</sup>* mesenteric arteries. (B) Mean diameter changes in response to two consecutive flow (15 dyn/cm<sup>2</sup>) stimuli. n=3. (C) Original traces demonstrating flow responses (15 dyn/cm<sup>2</sup>) in pressurized (80 mmHg) EC-intact and EC-denuded mesenteric arteries from *Pkd2<sup>fl/fl</sup>* mice. (D) Mean data for *Pkd2<sup>fl/fl</sup>* arteries. n=7 for EC-intact. n=6 for *Pkd2<sup>fl/fl</sup>* EC-intact. \* P<0.05 vs.EC-intact. n=8 for each.
