# Supplementary figures and images for: Intravascular flow stimulates PKD2 (polycystin-2) channels in endothelial cells to reduce blood pressure
Source: eLife journal article supplement (doi:10.7554/elife.56655), 2020-05-04

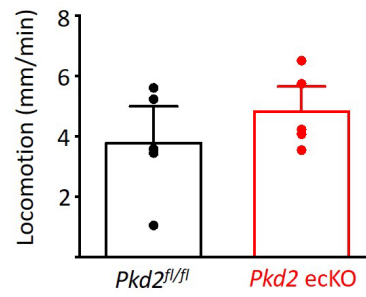

**Figure 8 – figure supplement 1.** Locomotion is similar in *Pkd2<sup>fl/fl</sup>* and *Pkd2 ecKO* mice (n=5 for each).

Supplement: supp [file elife-56655-supp-v1.zip › elife_poa_e56655_Figure_8_figure_supplement_1.pdf]
